# Supplementary material for: Three Bianthraquinone Derivatives from the Mangrove Endophytic Fungus Alternaria sp. ZJ9-6B from the South China Sea
Source: Mar Drugs. 2011 May 12;9(5):832–43. doi: 10.3390/md9050832 (PMC3111185; doi:10.3390/md9050832)

**Three Anthraquinone Derivatives from the Marine Mangrove  
Endophytic Fungus *Alternaria* sp. ZJ9-6B from the South China Sea**

**Cai-huan Huang<sup>1,2</sup>, Jia-hui Pan<sup>1</sup>, Bin Chen<sup>1</sup>, Miao Yu<sup>2</sup>, Hong-bo Huang<sup>1</sup>, Xun  
Zhu<sup>4</sup>, Yong-Jun Lu<sup>3</sup>, Zhi-gang She<sup>1,4</sup> and Yong-cheng Lin<sup>1,4,\*</sup>**

1 School of Chemistry and Chemical Engineering, Sun Yat-sen University, Guangzhou 510275, China; E-mails: caihuan2@sina.com.cn (C.H.); panjiahui@foxmail.com (J.P.); 32538503@qq.com (B.C.); 63160110@qq.com (M.Y.); syhbb007@163.com (H.H.); zhuxun333@gmail.com (X. Z.); luyj@mail.sysu.edu.cn (Y.L.); cessshzhg@mail.sysu.edu.cn (Z.S.).

2 School of Science and Engineering, Jinan University, Guangzhou 510632, China

3 School of life Sciences, Sun Yat-sen University, 510275 Guangzhou, China

4 Guangdong Province Key Laboratory of Functional Molecules in Oceanic Microorganism (Sun Yat-sen University), Bureau of Education of Guangdong, Guangzhou, China

\* Author to whom correspondence should be addressed; E-mail:

[ceslyc@mail.sysu.edu.cn](mailto:ceslyc@mail.sysu.edu.cn); Tel: +86-20-84039623; Fax: +86-20-84039623

## **Description of the Anti-cancer Activity Assay**

### **Preparation of Compounds 1 and 2**

Compounds **1** and **2** were dissolved in 0.5% dimethylsulphoxide (DMSO) at a concentration of 1 mM as stock solution and diluted according to experimental requirements when used.

### **Cell culture**

Human breast cancer cell lines MCF-7 and MDA-MB-435 were cultured in Dulbecco's modified Eagle's medium (DMEM) (Invitrogen, Carlsbad, CA, USA) supplemented with 5% fetal bovine serum (Hyclone, Logan, UT, USA), 2mM L-glutamine, 100 mg·mL<sup>-1</sup> streptomycin and 100 units·mL<sup>-1</sup> penicillin (Invitrogen). The cultures were maintained at 37°C in a humidified atmosphere of 5% CO<sub>2</sub>.

### **Viability assay**

Cells were seeded in 96-well flat-bottom plates at a density of 1×10<sup>4</sup> cells per well and cultured in a humidified incubator for 24 h, followed by exposure to various concentrations of compound 1 and 2 for 48 h respectively. Subsequently, 20 µL of 3-(4,5-dimethylthiazol-2-yl)-2,5-diphenyl tetrazolium bromide (MTT) reagent (Genview, Houston, TX, USA) dissolved in phosphate-buffered saline (PBS) (pH 7.4) at a concentration of 5 mg·mL<sup>-1</sup> was added to each well, and the cells were incubated for additional 4 h. The MTT-formazan crystals formed were dissolved in 150 µL DMSO (Sangon Biotech, Shanghai, China), and the absorbance was measured at 570 nm with a reference wavelength of 630 nm using a microplate reader. Cell growth inhibition was determined using the following formula according to a previously published method: growth inhibition (%) = (1-OD of treated cells/OD of control cells) ×100% (Moon et al., 2000). The half maximal inhibitory concentration (IC<sub>50</sub>) was calculated by Bliss's software (Bliss, 1935), and the data were analysed by SPSS. For all tests, the inhibition assays were performed in triplicate.

## **Table of contents**

**Figure S1.  $^1\text{H}$  spectrum of 1 (500 MHz, DMSO- $d_6$ ).**

**Figure S2.  $^{13}\text{C}$  spectrum of 1 (125 MHz, DMSO- $d_6$ ).**

**Figure S3. HMQC spectrum of 1 (500/125 MHz, DMSO- $d_6$ ).**

**Figure S4. HMBC spectrum of 1 (500/125 MHz, DMSO- $d_6$ ).**

**Figure S5. Expansion of HMBC spectrum of 1 (500 MHz, DMSO- $d_6$ ).**

**Figure S6.  $^1\text{H}$ - $^1\text{H}$  COSY spectrum of 1 (500 MHz, DMSO- $d_6$ ).**

**Figure S7. HR-EIMS spectrum of 1.**

**Figure S8.  $^1\text{H}$  spectrum of 2 (500 MHz, DMSO- $d_6$ ).**

**Figure S9.  $^{13}\text{C}$  spectrum of 2 (125 MHz, DMSO- $d_6$ ).**

**Figure S10. HMQC spectrum of 2 (500/125 MHz, DMSO- $d_6$ ).**

**Figure S11. HMBC spectrum of 2 (500/125 MHz, DMSO- $d_6$ ).**

**Figure S12.  $^1\text{H}$ - $^1\text{H}$  COSY spectrum of 2 (500 MHz, DMSO- $d_6$ ).**

**Figure S13. HR-ESIMS spectrum of 2**

**Figure S14.  $^1\text{H}$  spectrum of 3 (500 MHz, DMSO- $d_6$ ).**

**Figure S15.  $^{13}\text{C}$  spectrum of 3 (125 MHz, DMSO- $d_6$ ).**

**Figure S16. HMQC spectrum of 3 (500/125 MHz, DMSO- $d_6$ ).**

**Figure S17. HMBC spectrum of 3 (500/125 MHz, DMSO- $d_6$ ).**

**Figure S18.  $^1\text{H}$ - $^1\text{H}$  COSY spectrum of 3 (500 MHz, DMSO- $d_6$ ).**

**Figure S19. HR-ESIMS spectrum of 3**

**Figure S1.  $^1\text{H}$  spectrum of **1** (500 MHz,  $\text{DMSO-}d_6$ ).**

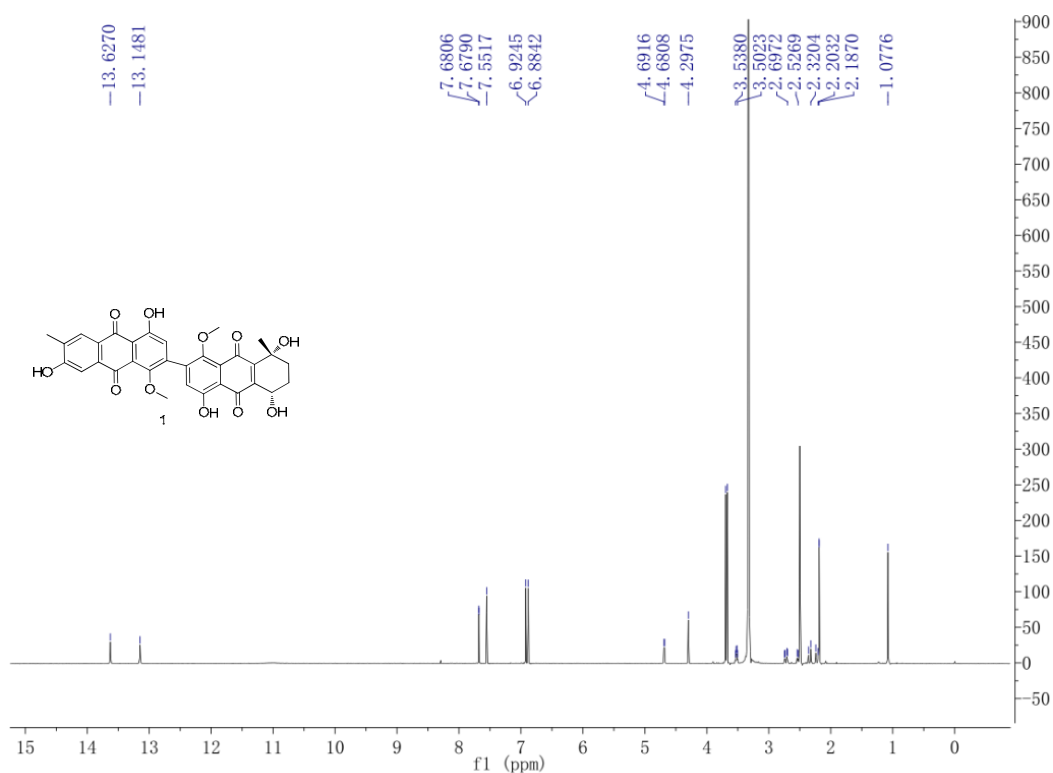

**Figure S2.  $^{13}\text{C}$  spectrum of **1** (125 MHz,  $\text{DMSO-}d_6$ ).**

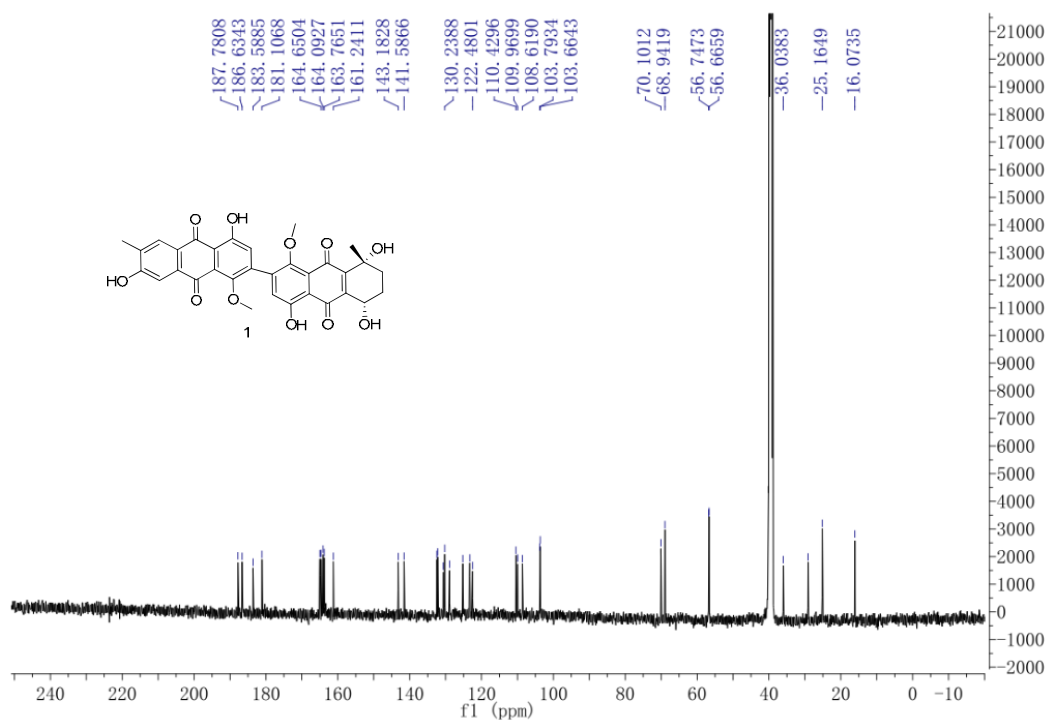

**Figure S3. HMQC spectrum of 1 (500/125 MHz, DMSO- $d_6$ ).**

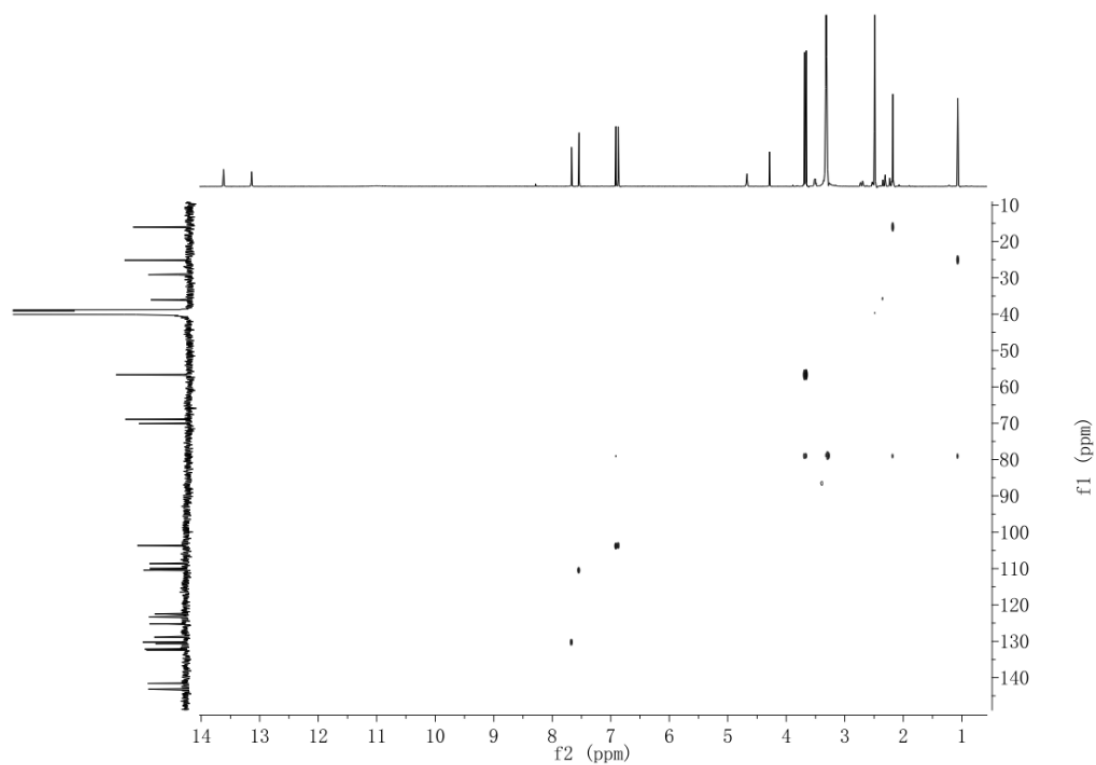

**Figure S4. HMBC spectrum of 1 (500/125 MHz, DMSO- $d_6$ ).**

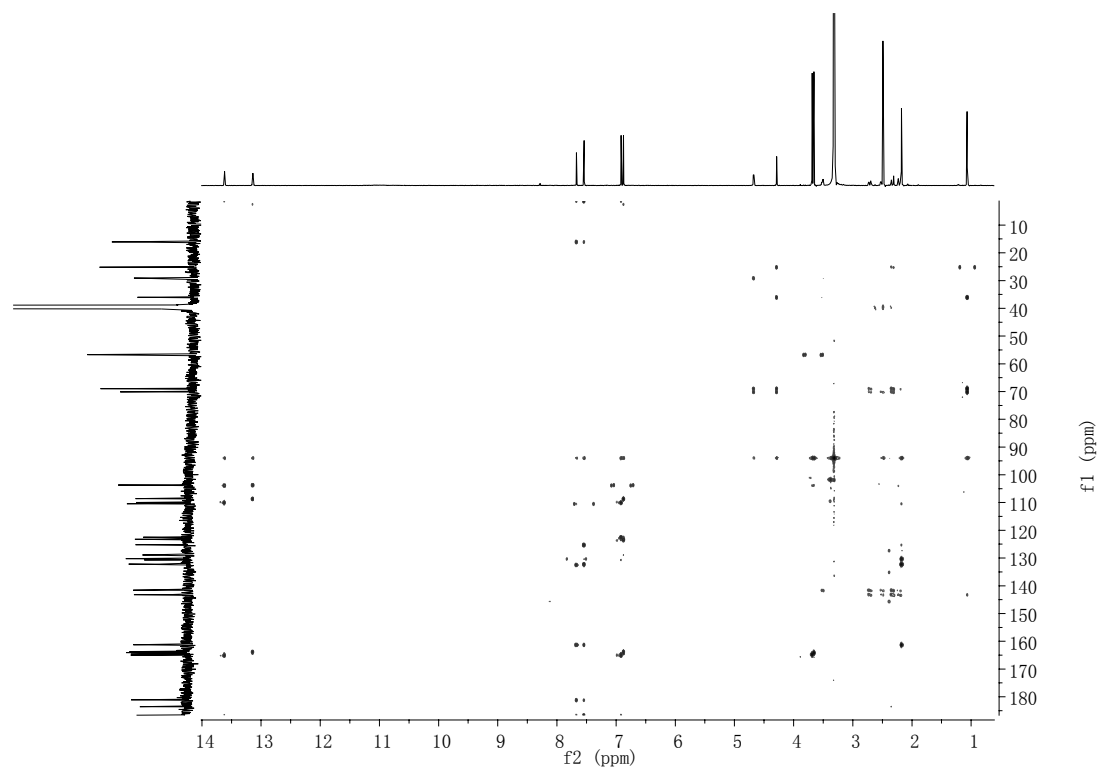

**Figure S5. Expansion of HMBC spectrum of 1 (500 MHz, DMSO- $d_6$ ).**

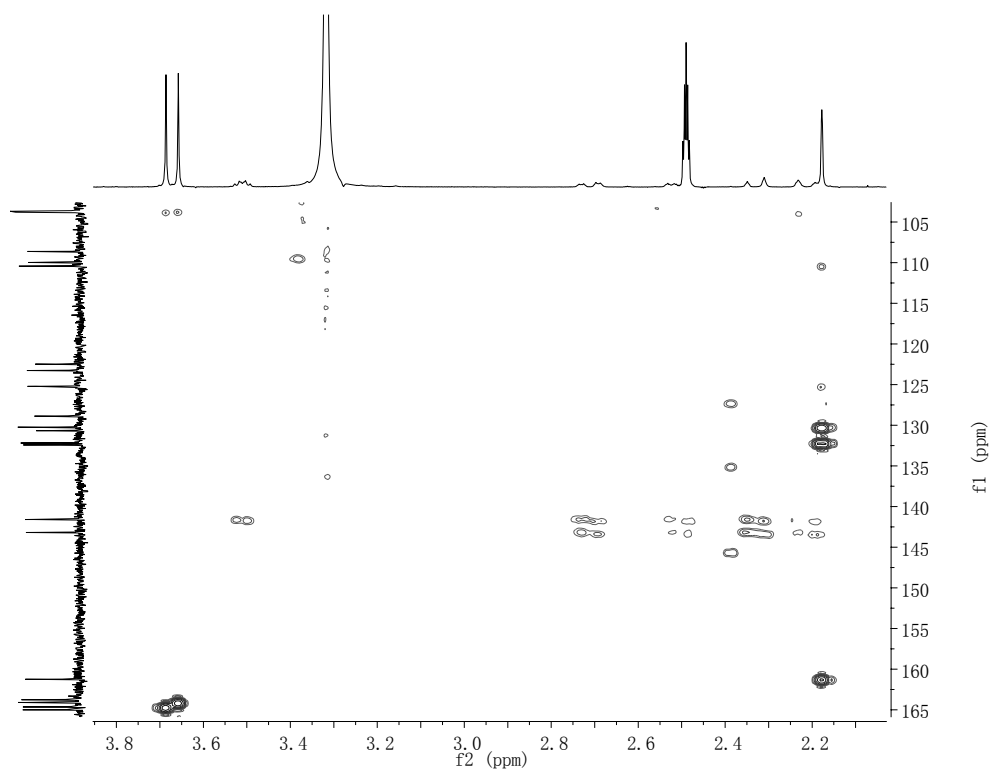

**Figure S6.  $^1\text{H}$ - $^1\text{H}$  COSY spectrum of 1 (500 MHz, DMSO- $d_6$ ).**

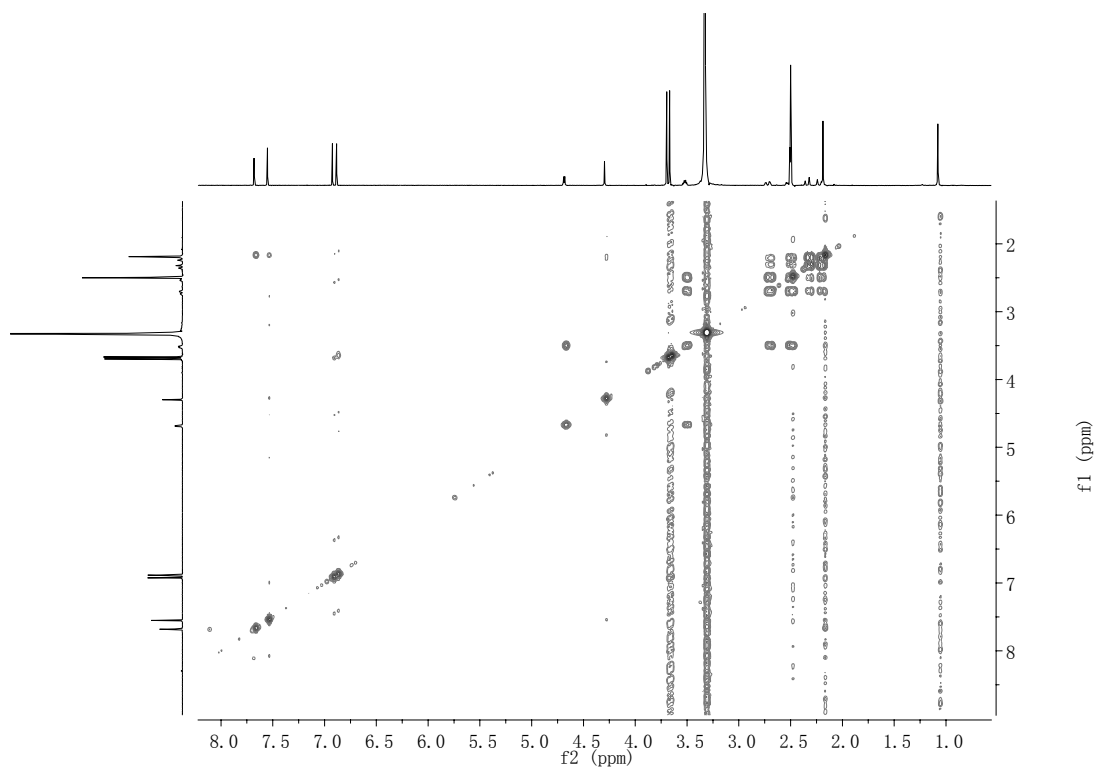

**Figure S7. HR-EIMS spectrum of 1.**

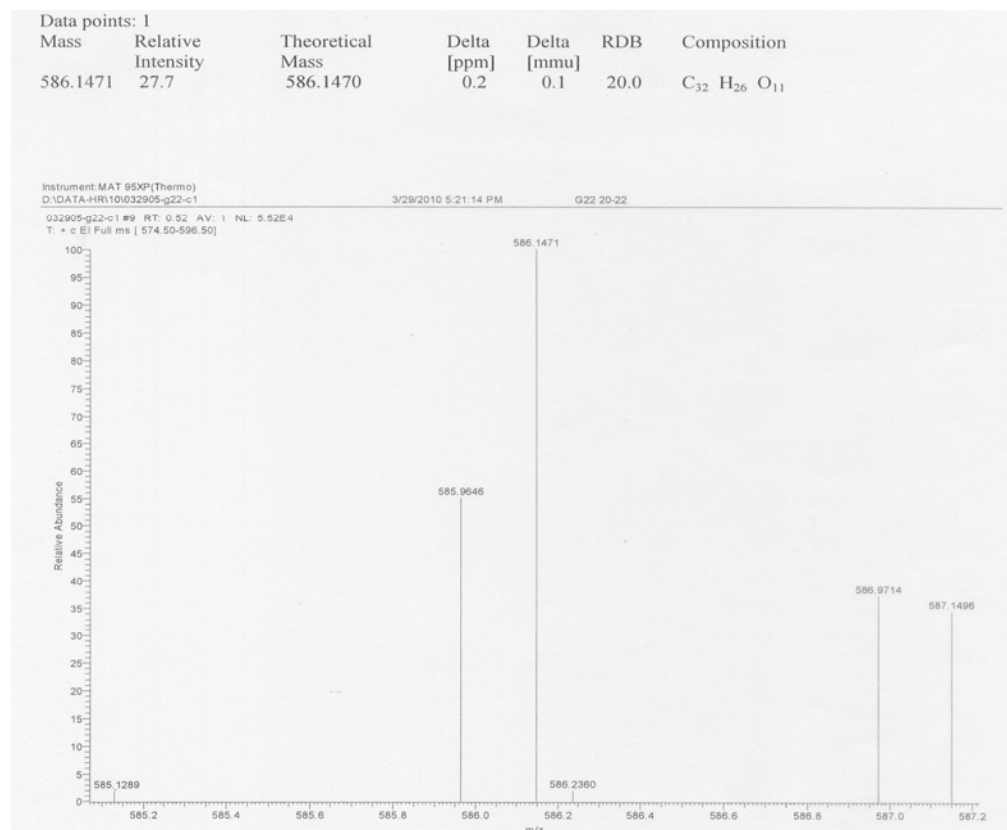

**Figure S8. <sup>1</sup>H spectrum of 2 (500 MHz, DMSO-d<sub>6</sub>).**

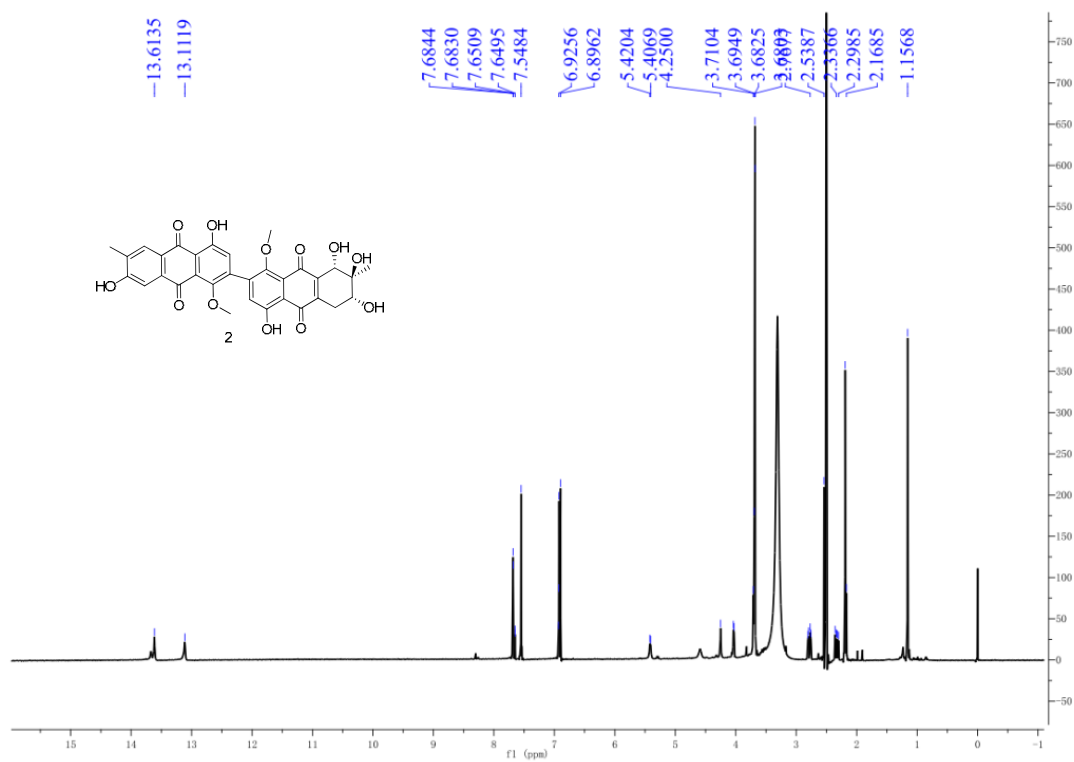

**Figure S9.**  $^{13}\text{C}$  spectrum of **2** (125 MHz,  $\text{DMSO-}d_6$ ).

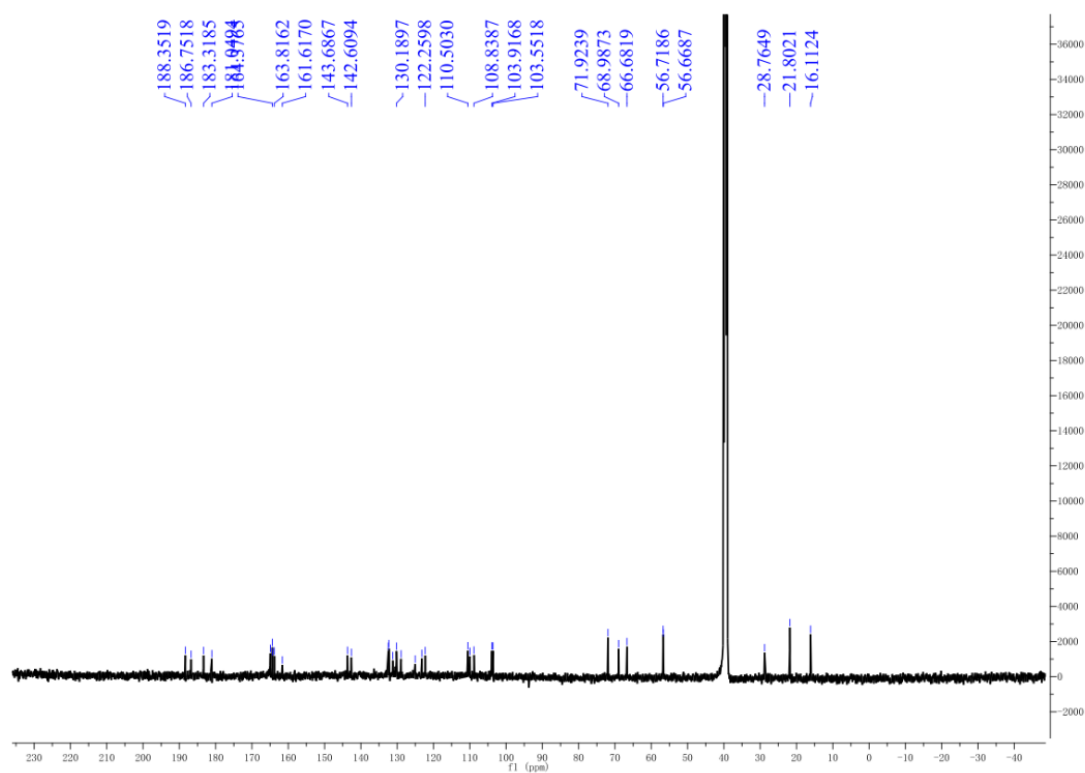

**Figure S10.** HMQC spectrum of **2** (500/125 MHz,  $\text{DMSO-}d_6$ ).

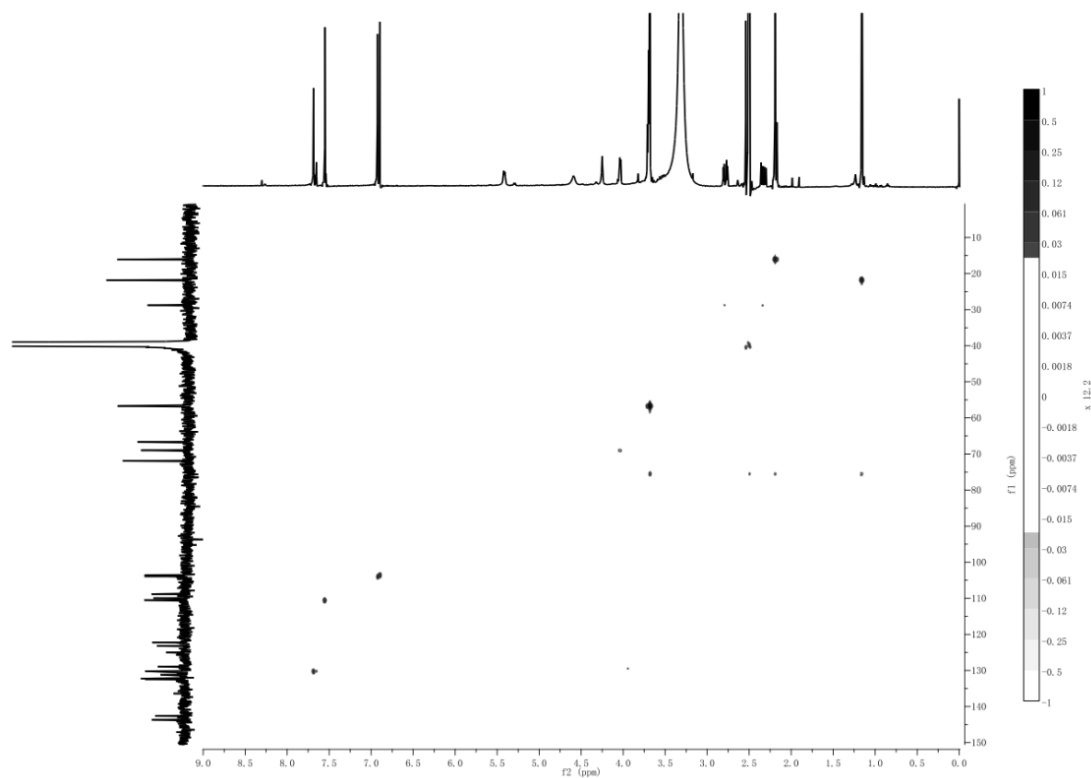

**Figure S11. HMBC spectrum of 2 (500/125 MHz, DMSO- $d_6$ ).**

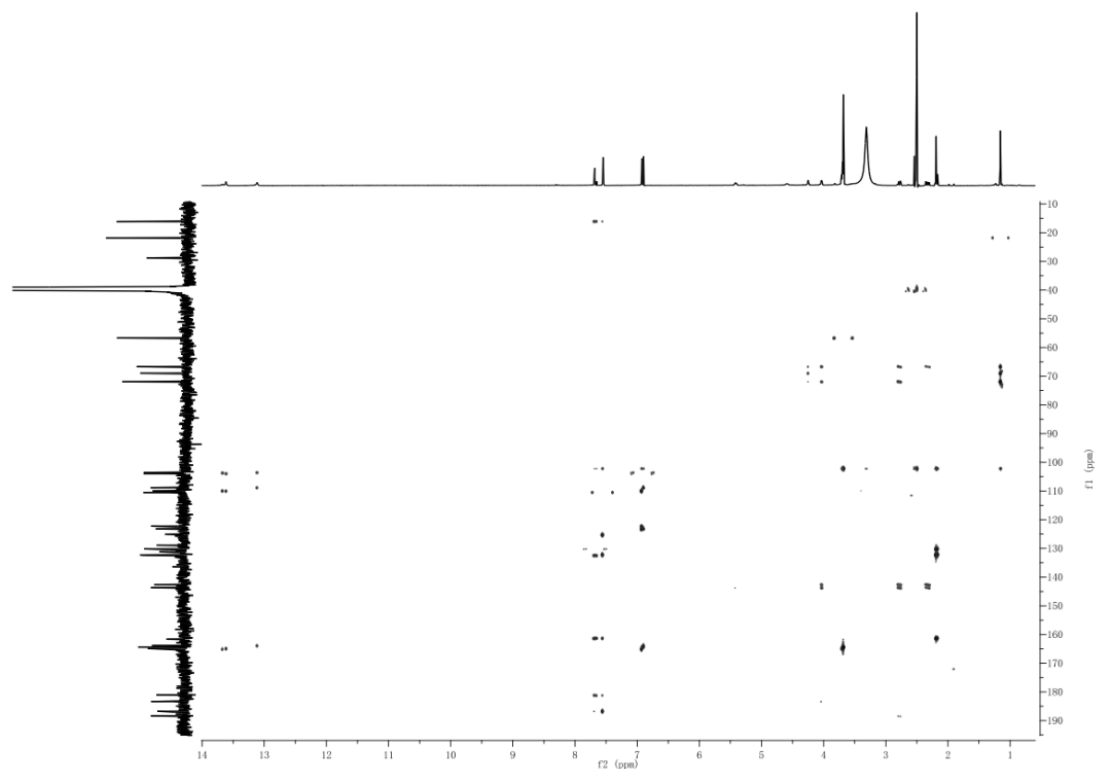

**Figure S12.  $^1\text{H}$ - $^1\text{H}$  COSY spectrum of 2 (500 MHz, DMSO- $d_6$ ).**

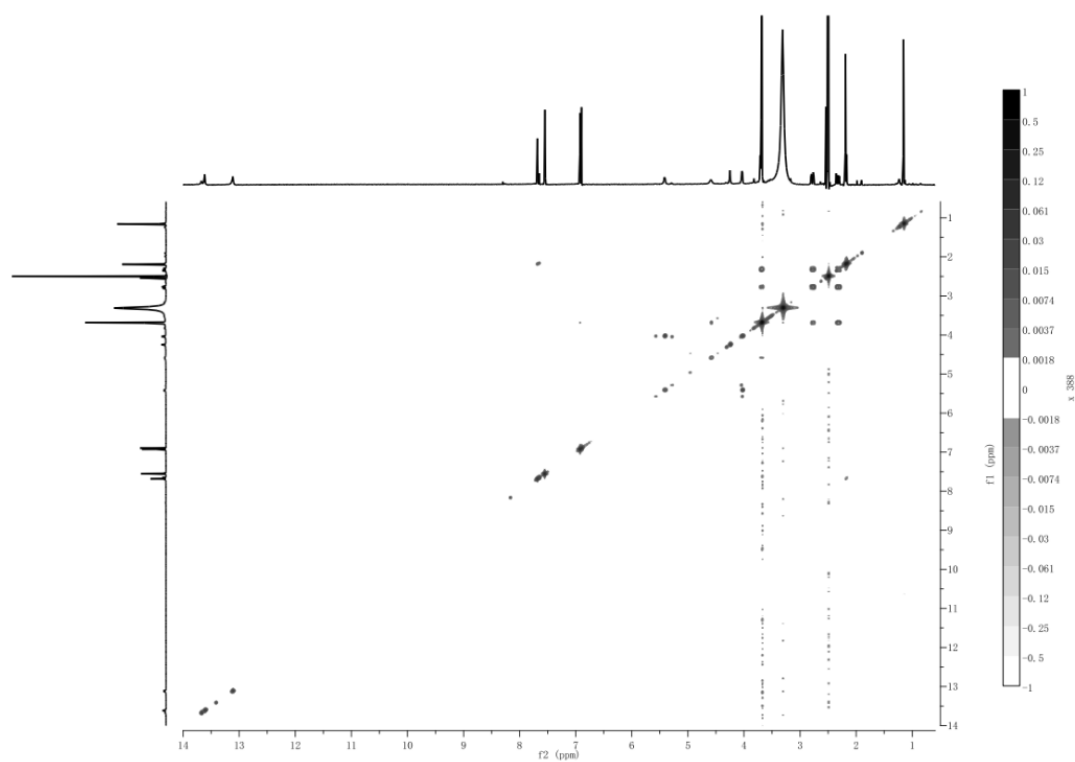

**Figure S13. HR-ESIMS spectrum of 2.**

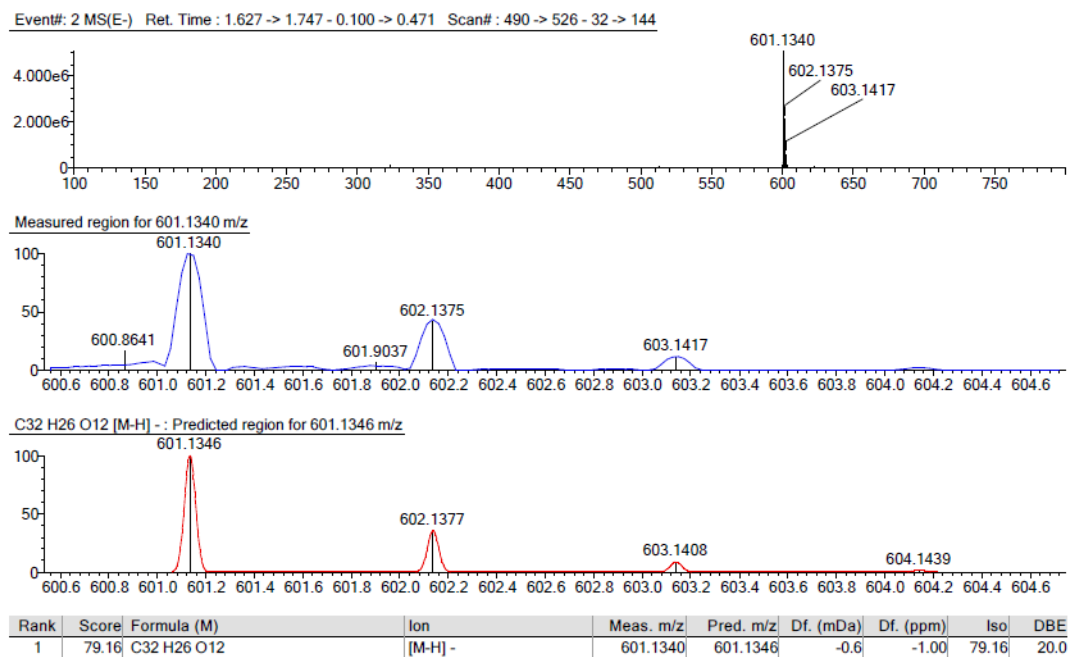

**Figure S14.  $^1\text{H}$  spectrum of 3 (500 MHz,  $\text{DMSO}-d_6$ ).**

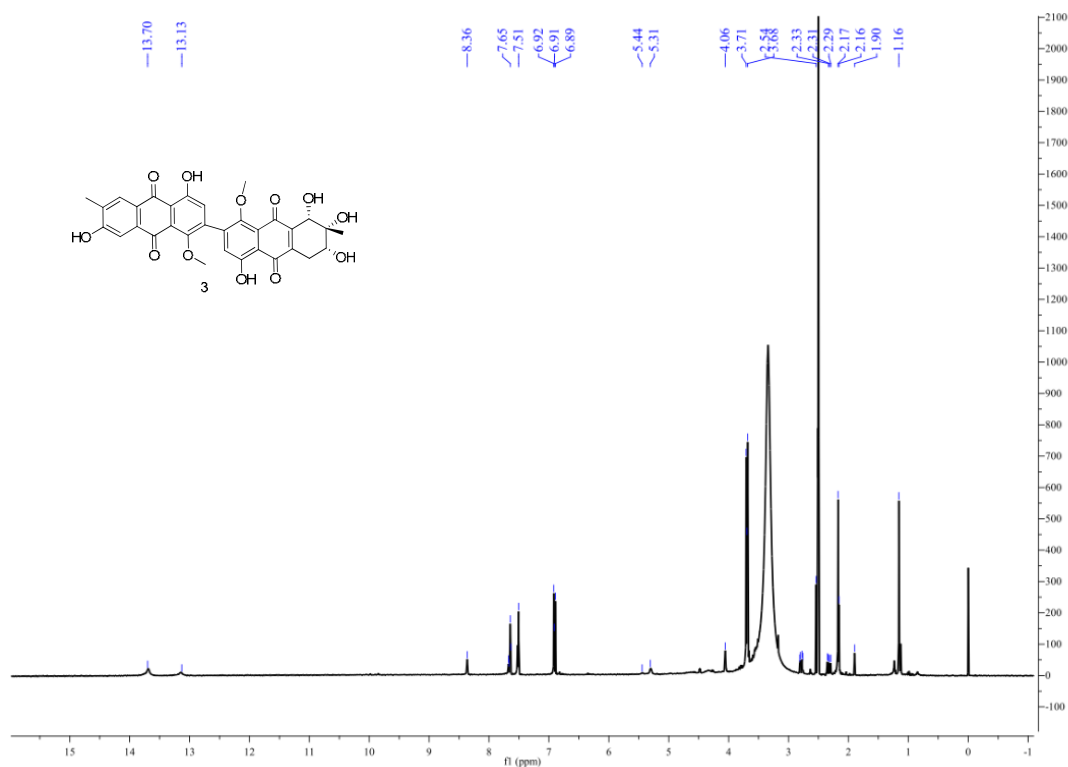

**Figure S15.**  $^{13}\text{C}$  spectrum of **3** (125 MHz,  $\text{DMSO-}d_6$ ).

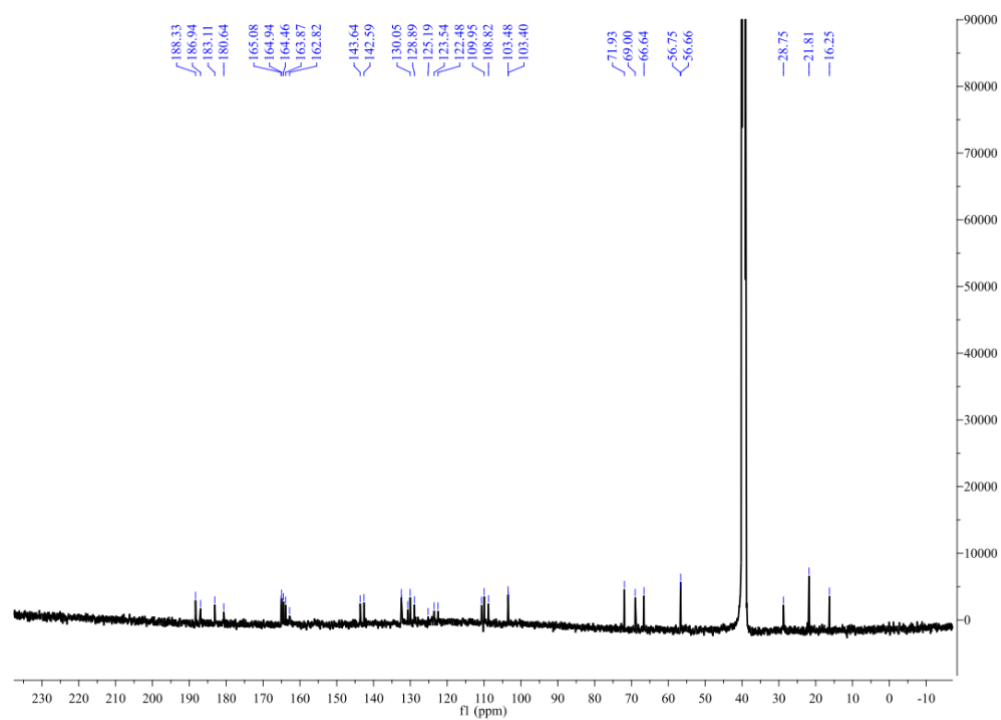

**Figure S16.** HMQC spectrum of **3** (500/125 MHz,  $\text{DMSO-}d_6$ ).

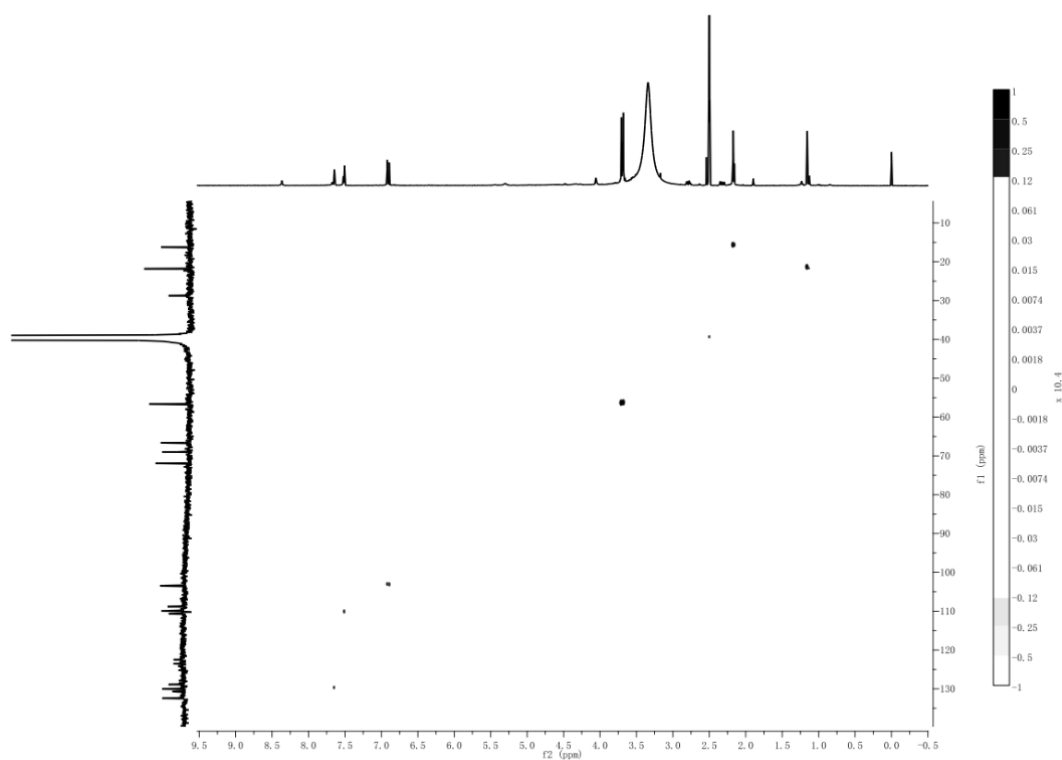

**Figure S17. HMBC spectrum of 3 (500/125 MHz, DMSO- $d_6$ ).**

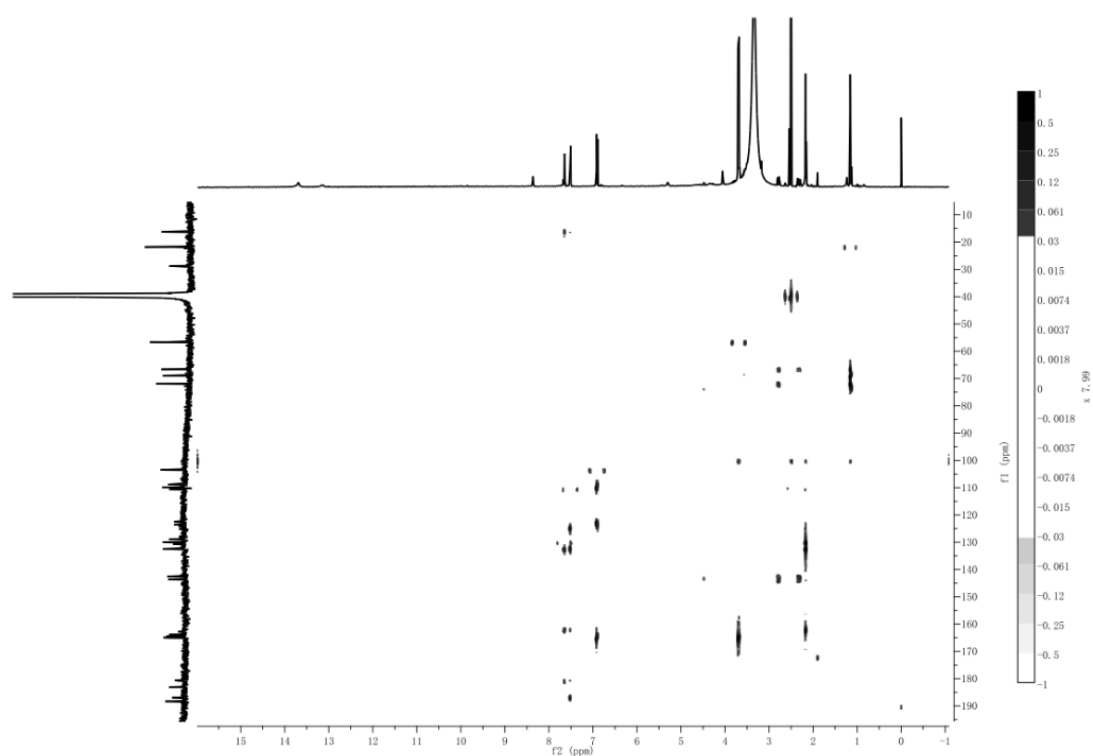

**Figure S18.  $^1\text{H}$ - $^1\text{H}$  COSY spectrum of 3 (500 MHz, DMSO- $d_6$ ).**

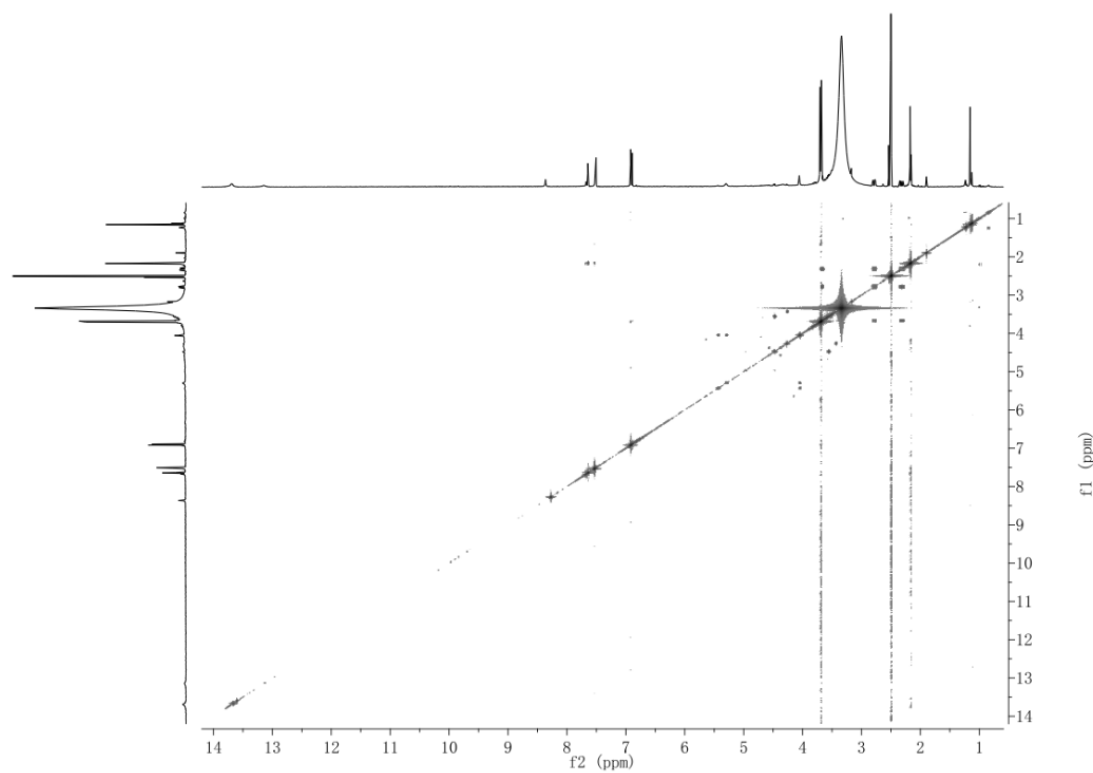

**Figure S19. HR-ESIMS spectrum of 3.**

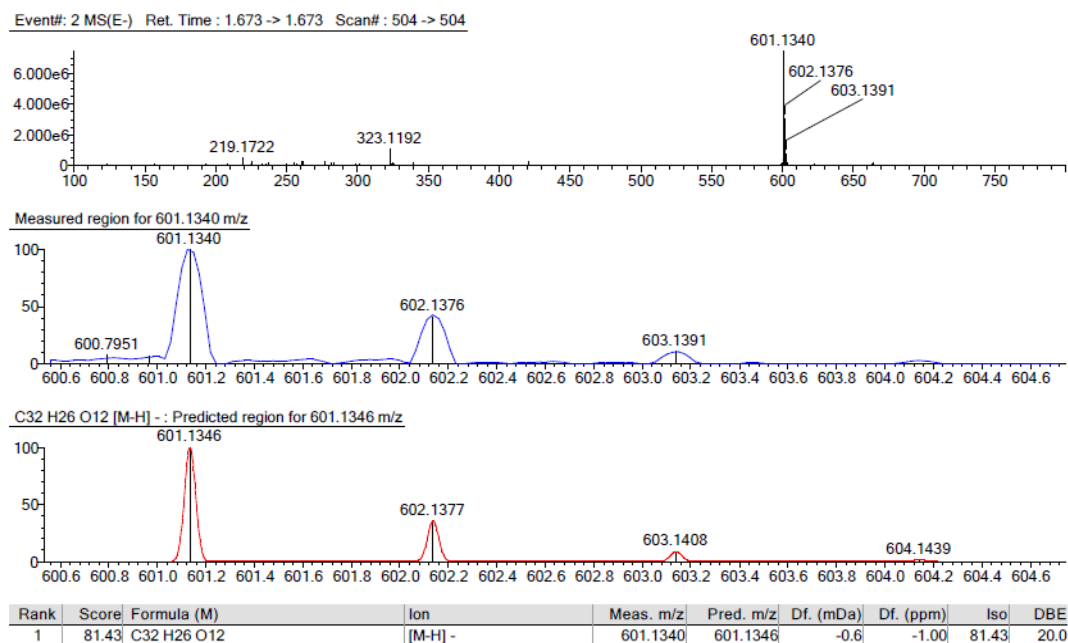

Supplement: Supplementary file 1 [file marinedrugs-09-00832-s001.pdf]
